# Supplementary material for: Synthesis and Characterization of Diosgenin Encapsulated Poly-ε-Caprolactone-Pluronic Nanoparticles and Its Effect on Brain Cancer Cells
Source: MDPI journal article supplement (doi:10.3390/polym13081322), 2021-04-18
Supplement: s1 [file s1]

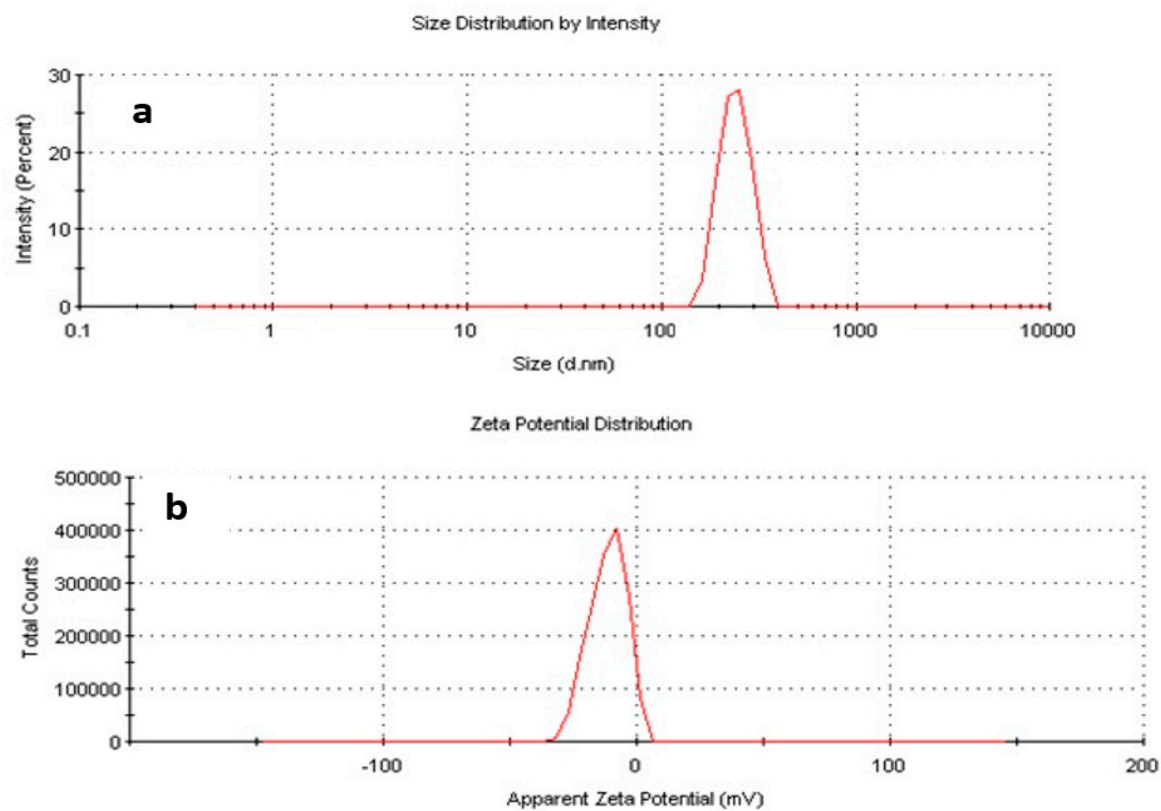

**Supplementary Figure S1.** (a) Particle size measurements with DLS and (b) zeta potential of synthesized Diosgenin loaded nanoparticles (PCL-F68-D-NPs).
