# Supplementary material for: Synthesis and Characterization of Diosgenin Encapsulated Poly-ε-Caprolactone-Pluronic Nanoparticles and Its Effect on Brain Cancer Cells
Source: Polymers (Basel). 2021 Apr 18;13(8):1322. doi: 10.3390/polym13081322 (PMC8073865; doi:10.3390/polym13081322)
Supplement: Supplementary file 1 [file polymers-13-01322-s001.zip › ANOVA TUKEY test.xlsx]

## Sheet: conc. vs viability
			Viability
conc. (µM)	Diosgenin	Diosgenin	Diosgenin		Diosgenin loaded nanoparticles
0	100	104.78	100.67	94.98	97.89	93.98
1	99.78	97.4	96.56	88	85.85	87.65
5	93.72	90.48	91.65	65.95	68.32	66.67
10	80.23	84.73	85.73	59.9	57.78	56.65
20	51.45	49.67	56.54	42	44.28	45.95
40	44.34	46.45	43.51	37	39.54	38.83
60	31.23	36.68	32.25	28	33.29	29.04
80	20.05	19.18	22.54	13.98	17.89	15.98
100	11.38	13.23	10.29	6.32	9.11	8.89

## Sheet: ANOVA
Two-way ANOVA	Ordinary
Alpha	0.05
Source of Variation	% of total variation	P value	P value summary	Significant?
Interaction	1.74	<0.0001	****	Yes
concentration	95.18	<0.0001	****	Yes
viability	2.784	<0.0001	****	Yes
ANOVA table	SS	DF	MS	F (DFn, DFd)	P value
Interaction	912.4	8	114	F (8, 36) = 26.05	P<0.0001
concentration	49912	8	6239	F (8, 36) = 1425	P<0.0001
viability	1460	1	1460	F (1, 36) = 333.5	P<0.0001
Residual	157.6	36	4.378
Difference between column means
Mean of Diosgenin	59.8
Mean of Diosgenin loaded nanoparticles	49.4
Difference between means	10.4
SE of difference	0.5695
95% CI of difference	9.245 to 11.55

## Sheet: TUKEY'S TEST
Compare cell means regardless of rows and columns
Number of families	1
Number of comparisons per family	153
Alpha	0.05
Tukey's multiple comparisons test	Mean Diff.	95.00% CI of diff.	Significant?	Summary	Adjusted P Value
0:Diosgenin vs. 0:Diosgenin loaded nanoparticles	6.2	-0.2072 to 12.61	No	ns	0.0669
0:Diosgenin vs. 1:Diosgenin	3.903	-2.504 to 10.31	No	ns	0.688
0:Diosgenin vs. 1:Diosgenin loaded nanoparticles	14.65	8.243 to 21.06	Yes	****	<0.0001
0:Diosgenin vs. 5:Diosgenin	9.867	3.459 to 16.27	Yes	***	0.0002
0:Diosgenin vs. 5:Diosgenin loaded nanoparticles	34.84	28.43 to 41.24	Yes	****	<0.0001
0:Diosgenin vs. 10:Diosgenin	18.25	11.85 to 24.66	Yes	****	<0.0001
0:Diosgenin vs. 10:Diosgenin loaded nanoparticles	43.71	37.30 to 50.11	Yes	****	<0.0001
0:Diosgenin vs. 20:Diosgenin	49.26	42.86 to 55.67	Yes	****	<0.0001
0:Diosgenin vs. 20:Diosgenin loaded nanoparticles	57.74	51.33 to 64.15	Yes	****	<0.0001
0:Diosgenin vs. 40:Diosgenin	57.05	50.64 to 63.46	Yes	****	<0.0001
0:Diosgenin vs. 40:Diosgenin loaded nanoparticles	63.36	56.95 to 69.77	Yes	****	<0.0001
0:Diosgenin vs. 60:Diosgenin	68.43	62.02 to 74.84	Yes	****	<0.0001
0:Diosgenin vs. 60:Diosgenin loaded nanoparticles	71.71	65.30 to 78.11	Yes	****	<0.0001
0:Diosgenin vs. 80:Diosgenin	81.23	74.82 to 87.63	Yes	****	<0.0001
0:Diosgenin vs. 80:Diosgenin loaded nanoparticles	85.87	79.46 to 92.27	Yes	****	<0.0001
0:Diosgenin vs. 100:Diosgenin	90.18	83.78 to 96.59	Yes	****	<0.0001
0:Diosgenin vs. 100:Diosgenin loaded nanoparticles	93.71	87.30 to 100.1	Yes	****	<0.0001
0:Diosgenin loaded nanoparticles vs. 1:Diosgenin	-2.297	-8.704 to 4.111	No	ns	0.9951
0:Diosgenin loaded nanoparticles vs. 1:Diosgenin loaded nanoparticles	8.45	2.043 to 14.86	Yes	**	0.002
0:Diosgenin loaded nanoparticles vs. 5:Diosgenin	3.667	-2.741 to 10.07	No	ns	0.7731
0:Diosgenin loaded nanoparticles vs. 5:Diosgenin loaded nanoparticles	28.64	22.23 to 35.04	Yes	****	<0.0001
0:Diosgenin loaded nanoparticles vs. 10:Diosgenin	12.05	5.646 to 18.46	Yes	****	<0.0001
0:Diosgenin loaded nanoparticles vs. 10:Diosgenin loaded nanoparticles	37.51	31.10 to 43.91	Yes	****	<0.0001
0:Diosgenin loaded nanoparticles vs. 20:Diosgenin	43.06	36.66 to 49.47	Yes	****	<0.0001
0:Diosgenin loaded nanoparticles vs. 20:Diosgenin loaded nanoparticles	51.54	45.13 to 57.95	Yes	****	<0.0001
0:Diosgenin loaded nanoparticles vs. 40:Diosgenin	50.85	44.44 to 57.26	Yes	****	<0.0001
0:Diosgenin loaded nanoparticles vs. 40:Diosgenin loaded nanoparticles	57.16	50.75 to 63.57	Yes	****	<0.0001
0:Diosgenin loaded nanoparticles vs. 60:Diosgenin	62.23	55.82 to 68.64	Yes	****	<0.0001
0:Diosgenin loaded nanoparticles vs. 60:Diosgenin loaded nanoparticles	65.51	59.10 to 71.91	Yes	****	<0.0001
0:Diosgenin loaded nanoparticles vs. 80:Diosgenin	75.03	68.62 to 81.43	Yes	****	<0.0001
0:Diosgenin loaded nanoparticles vs. 80:Diosgenin loaded nanoparticles	79.67	73.26 to 86.07	Yes	****	<0.0001
0:Diosgenin loaded nanoparticles vs. 100:Diosgenin	83.98	77.58 to 90.39	Yes	****	<0.0001
0:Diosgenin loaded nanoparticles vs. 100:Diosgenin loaded nanoparticles	87.51	81.10 to 93.92	Yes	****	<0.0001
1:Diosgenin vs. 1:Diosgenin loaded nanoparticles	10.75	4.339 to 17.15	Yes	****	<0.0001
1:Diosgenin vs. 5:Diosgenin	5.963	-0.4439 to 12.37	No	ns	0.092
1:Diosgenin vs. 5:Diosgenin loaded nanoparticles	30.93	24.53 to 37.34	Yes	****	<0.0001
1:Diosgenin vs. 10:Diosgenin	14.35	7.943 to 20.76	Yes	****	<0.0001
1:Diosgenin vs. 10:Diosgenin loaded nanoparticles	39.8	33.40 to 46.21	Yes	****	<0.0001
1:Diosgenin vs. 20:Diosgenin	45.36	38.95 to 51.77	Yes	****	<0.0001
1:Diosgenin vs. 20:Diosgenin loaded nanoparticles	53.84	47.43 to 60.24	Yes	****	<0.0001
1:Diosgenin vs. 40:Diosgenin	53.15	46.74 to 59.55	Yes	****	<0.0001
1:Diosgenin vs. 40:Diosgenin loaded nanoparticles	59.46	53.05 to 65.86	Yes	****	<0.0001
1:Diosgenin vs. 60:Diosgenin	64.53	58.12 to 70.93	Yes	****	<0.0001
1:Diosgenin vs. 60:Diosgenin loaded nanoparticles	67.8	61.40 to 74.21	Yes	****	<0.0001
1:Diosgenin vs. 80:Diosgenin	77.32	70.92 to 83.73	Yes	****	<0.0001
1:Diosgenin vs. 80:Diosgenin loaded nanoparticles	81.96	75.56 to 88.37	Yes	****	<0.0001
1:Diosgenin vs. 100:Diosgenin	86.28	79.87 to 92.69	Yes	****	<0.0001
1:Diosgenin vs. 100:Diosgenin loaded nanoparticles	89.81	83.40 to 96.21	Yes	****	<0.0001
1:Diosgenin loaded nanoparticles vs. 5:Diosgenin	-4.783	-11.19 to 1.624	No	ns	0.3557
1:Diosgenin loaded nanoparticles vs. 5:Diosgenin loaded nanoparticles	20.19	13.78 to 26.59	Yes	****	<0.0001
1:Diosgenin loaded nanoparticles vs. 10:Diosgenin	3.603	-2.804 to 10.01	No	ns	0.7941
1:Diosgenin loaded nanoparticles vs. 10:Diosgenin loaded nanoparticles	29.06	22.65 to 35.46	Yes	****	<0.0001
1:Diosgenin loaded nanoparticles vs. 20:Diosgenin	34.61	28.21 to 41.02	Yes	****	<0.0001
1:Diosgenin loaded nanoparticles vs. 20:Diosgenin loaded nanoparticles	43.09	36.68 to 49.50	Yes	****	<0.0001
1:Diosgenin loaded nanoparticles vs. 40:Diosgenin	42.4	35.99 to 48.81	Yes	****	<0.0001
1:Diosgenin loaded nanoparticles vs. 40:Diosgenin loaded nanoparticles	48.71	42.30 to 55.12	Yes	****	<0.0001
1:Diosgenin loaded nanoparticles vs. 60:Diosgenin	53.78	47.37 to 60.19	Yes	****	<0.0001
1:Diosgenin loaded nanoparticles vs. 60:Diosgenin loaded nanoparticles	57.06	50.65 to 63.46	Yes	****	<0.0001
1:Diosgenin loaded nanoparticles vs. 80:Diosgenin	66.58	60.17 to 72.98	Yes	****	<0.0001
1:Diosgenin loaded nanoparticles vs. 80:Diosgenin loaded nanoparticles	71.22	64.81 to 77.62	Yes	****	<0.0001
1:Diosgenin loaded nanoparticles vs. 100:Diosgenin	75.53	69.13 to 81.94	Yes	****	<0.0001
1:Diosgenin loaded nanoparticles vs. 100:Diosgenin loaded nanoparticles	79.06	72.65 to 85.47	Yes	****	<0.0001
5:Diosgenin vs. 5:Diosgenin loaded nanoparticles	24.97	18.56 to 31.38	Yes	****	<0.0001
5:Diosgenin vs. 10:Diosgenin	8.387	1.979 to 14.79	Yes	**	0.0022
5:Diosgenin vs. 10:Diosgenin loaded nanoparticles	33.84	27.43 to 40.25	Yes	****	<0.0001
5:Diosgenin vs. 20:Diosgenin	39.4	32.99 to 45.80	Yes	****	<0.0001
5:Diosgenin vs. 20:Diosgenin loaded nanoparticles	47.87	41.47 to 54.28	Yes	****	<0.0001
5:Diosgenin vs. 40:Diosgenin	47.18	40.78 to 53.59	Yes	****	<0.0001
5:Diosgenin vs. 40:Diosgenin loaded nanoparticles	53.49	47.09 to 59.90	Yes	****	<0.0001
5:Diosgenin vs. 60:Diosgenin	58.56	52.16 to 64.97	Yes	****	<0.0001
5:Diosgenin vs. 60:Diosgenin loaded nanoparticles	61.84	55.43 to 68.25	Yes	****	<0.0001
5:Diosgenin vs. 80:Diosgenin	71.36	64.95 to 77.77	Yes	****	<0.0001
5:Diosgenin vs. 80:Diosgenin loaded nanoparticles	76	69.59 to 82.41	Yes	****	<0.0001
5:Diosgenin vs. 100:Diosgenin	80.32	73.91 to 86.72	Yes	****	<0.0001
5:Diosgenin vs. 100:Diosgenin loaded nanoparticles	83.84	77.44 to 90.25	Yes	****	<0.0001
5:Diosgenin loaded nanoparticles vs. 10:Diosgenin	-16.58	-22.99 to -10.18	Yes	****	<0.0001
5:Diosgenin loaded nanoparticles vs. 10:Diosgenin loaded nanoparticles	8.87	2.463 to 15.28	Yes	***	0.001
5:Diosgenin loaded nanoparticles vs. 20:Diosgenin	14.43	8.019 to 20.83	Yes	****	<0.0001
5:Diosgenin loaded nanoparticles vs. 20:Diosgenin loaded nanoparticles	22.9	16.50 to 29.31	Yes	****	<0.0001
5:Diosgenin loaded nanoparticles vs. 40:Diosgenin	22.21	15.81 to 28.62	Yes	****	<0.0001
5:Diosgenin loaded nanoparticles vs. 40:Diosgenin loaded nanoparticles	28.52	22.12 to 34.93	Yes	****	<0.0001
5:Diosgenin loaded nanoparticles vs. 60:Diosgenin	33.59	27.19 to 40.00	Yes	****	<0.0001
5:Diosgenin loaded nanoparticles vs. 60:Diosgenin loaded nanoparticles	36.87	30.46 to 43.28	Yes	****	<0.0001
5:Diosgenin loaded nanoparticles vs. 80:Diosgenin	46.39	39.98 to 52.80	Yes	****	<0.0001
5:Diosgenin loaded nanoparticles vs. 80:Diosgenin loaded nanoparticles	51.03	44.62 to 57.44	Yes	****	<0.0001
5:Diosgenin loaded nanoparticles vs. 100:Diosgenin	55.35	48.94 to 61.75	Yes	****	<0.0001
5:Diosgenin loaded nanoparticles vs. 100:Diosgenin loaded nanoparticles	58.87	52.47 to 65.28	Yes	****	<0.0001
10:Diosgenin vs. 10:Diosgenin loaded nanoparticles	25.45	19.05 to 31.86	Yes	****	<0.0001
10:Diosgenin vs. 20:Diosgenin	31.01	24.60 to 37.42	Yes	****	<0.0001
10:Diosgenin vs. 20:Diosgenin loaded nanoparticles	39.49	33.08 to 45.89	Yes	****	<0.0001
10:Diosgenin vs. 40:Diosgenin	38.8	32.39 to 45.20	Yes	****	<0.0001
10:Diosgenin vs. 40:Diosgenin loaded nanoparticles	45.11	38.70 to 51.51	Yes	****	<0.0001
10:Diosgenin vs. 60:Diosgenin	50.18	43.77 to 56.58	Yes	****	<0.0001
10:Diosgenin vs. 60:Diosgenin loaded nanoparticles	53.45	47.05 to 59.86	Yes	****	<0.0001
10:Diosgenin vs. 80:Diosgenin	62.97	56.57 to 69.38	Yes	****	<0.0001
10:Diosgenin vs. 80:Diosgenin loaded nanoparticles	67.61	61.21 to 74.02	Yes	****	<0.0001
10:Diosgenin vs. 100:Diosgenin	71.93	65.52 to 78.34	Yes	****	<0.0001
10:Diosgenin vs. 100:Diosgenin loaded nanoparticles	75.46	69.05 to 81.86	Yes	****	<0.0001
10:Diosgenin loaded nanoparticles vs. 20:Diosgenin	5.557	-0.8505 to 11.96	No	ns	0.1541
10:Diosgenin loaded nanoparticles vs. 20:Diosgenin loaded nanoparticles	14.03	7.626 to 20.44	Yes	****	<0.0001
10:Diosgenin loaded nanoparticles vs. 40:Diosgenin	13.34	6.936 to 19.75	Yes	****	<0.0001
10:Diosgenin loaded nanoparticles vs. 40:Diosgenin loaded nanoparticles	19.65	13.25 to 26.06	Yes	****	<0.0001
10:Diosgenin loaded nanoparticles vs. 60:Diosgenin	24.72	18.32 to 31.13	Yes	****	<0.0001
10:Diosgenin loaded nanoparticles vs. 60:Diosgenin loaded nanoparticles	28	21.59 to 34.41	Yes	****	<0.0001
10:Diosgenin loaded nanoparticles vs. 80:Diosgenin	37.52	31.11 to 43.93	Yes	****	<0.0001
10:Diosgenin loaded nanoparticles vs. 80:Diosgenin loaded nanoparticles	42.16	35.75 to 48.57	Yes	****	<0.0001
10:Diosgenin loaded nanoparticles vs. 100:Diosgenin	46.48	40.07 to 52.88	Yes	****	<0.0001
10:Diosgenin loaded nanoparticles vs. 100:Diosgenin loaded nanoparticles	50	43.60 to 56.41	Yes	****	<0.0001
20:Diosgenin vs. 20:Diosgenin loaded nanoparticles	8.477	2.069 to 14.88	Yes	**	0.0019
20:Diosgenin vs. 40:Diosgenin	7.787	1.379 to 14.19	Yes	**	0.006
20:Diosgenin vs. 40:Diosgenin loaded nanoparticles	14.1	7.689 to 20.50	Yes	****	<0.0001
20:Diosgenin vs. 60:Diosgenin	19.17	12.76 to 25.57	Yes	****	<0.0001
20:Diosgenin vs. 60:Diosgenin loaded nanoparticles	22.44	16.04 to 28.85	Yes	****	<0.0001
20:Diosgenin vs. 80:Diosgenin	31.96	25.56 to 38.37	Yes	****	<0.0001
20:Diosgenin vs. 80:Diosgenin loaded nanoparticles	36.6	30.20 to 43.01	Yes	****	<0.0001
20:Diosgenin vs. 100:Diosgenin	40.92	34.51 to 47.33	Yes	****	<0.0001
20:Diosgenin vs. 100:Diosgenin loaded nanoparticles	44.45	38.04 to 50.85	Yes	****	<0.0001
20:Diosgenin loaded nanoparticles vs. 40:Diosgenin	-0.69	-7.097 to 5.717	No	ns	>0.9999
20:Diosgenin loaded nanoparticles vs. 40:Diosgenin loaded nanoparticles	5.62	-0.7872 to 12.03	No	ns	0.1427
20:Diosgenin loaded nanoparticles vs. 60:Diosgenin	10.69	4.283 to 17.10	Yes	****	<0.0001
20:Diosgenin loaded nanoparticles vs. 60:Diosgenin loaded nanoparticles	13.97	7.559 to 20.37	Yes	****	<0.0001
20:Diosgenin loaded nanoparticles vs. 80:Diosgenin	23.49	17.08 to 29.89	Yes	****	<0.0001
20:Diosgenin loaded nanoparticles vs. 80:Diosgenin loaded nanoparticles	28.13	21.72 to 34.53	Yes	****	<0.0001
20:Diosgenin loaded nanoparticles vs. 100:Diosgenin	32.44	26.04 to 38.85	Yes	****	<0.0001
20:Diosgenin loaded nanoparticles vs. 100:Diosgenin loaded nanoparticles	35.97	29.56 to 42.38	Yes	****	<0.0001
40:Diosgenin vs. 40:Diosgenin loaded nanoparticles	6.31	-0.09721 to 12.72	No	ns	0.0574
40:Diosgenin vs. 60:Diosgenin	11.38	4.973 to 17.79	Yes	****	<0.0001
40:Diosgenin vs. 60:Diosgenin loaded nanoparticles	14.66	8.249 to 21.06	Yes	****	<0.0001
40:Diosgenin vs. 80:Diosgenin	24.18	17.77 to 30.58	Yes	****	<0.0001
40:Diosgenin vs. 80:Diosgenin loaded nanoparticles	28.82	22.41 to 35.22	Yes	****	<0.0001
40:Diosgenin vs. 100:Diosgenin	33.13	26.73 to 39.54	Yes	****	<0.0001
40:Diosgenin vs. 100:Diosgenin loaded nanoparticles	36.66	30.25 to 43.07	Yes	****	<0.0001
40:Diosgenin loaded nanoparticles vs. 60:Diosgenin	5.07	-1.337 to 11.48	No	ns	0.2674
40:Diosgenin loaded nanoparticles vs. 60:Diosgenin loaded nanoparticles	8.347	1.939 to 14.75	Yes	**	0.0024
40:Diosgenin loaded nanoparticles vs. 80:Diosgenin	17.87	11.46 to 24.27	Yes	****	<0.0001
40:Diosgenin loaded nanoparticles vs. 80:Diosgenin loaded nanoparticles	22.51	16.10 to 28.91	Yes	****	<0.0001
40:Diosgenin loaded nanoparticles vs. 100:Diosgenin	26.82	20.42 to 33.23	Yes	****	<0.0001
40:Diosgenin loaded nanoparticles vs. 100:Diosgenin loaded nanoparticles	30.35	23.94 to 36.76	Yes	****	<0.0001
60:Diosgenin vs. 60:Diosgenin loaded nanoparticles	3.277	-3.131 to 9.684	No	ns	0.8864
60:Diosgenin vs. 80:Diosgenin	12.8	6.389 to 19.20	Yes	****	<0.0001
60:Diosgenin vs. 80:Diosgenin loaded nanoparticles	17.44	11.03 to 23.84	Yes	****	<0.0001
60:Diosgenin vs. 100:Diosgenin	21.75	15.35 to 28.16	Yes	****	<0.0001
60:Diosgenin vs. 100:Diosgenin loaded nanoparticles	25.28	18.87 to 31.69	Yes	****	<0.0001
60:Diosgenin loaded nanoparticles vs. 80:Diosgenin	9.52	3.113 to 15.93	Yes	***	0.0003
60:Diosgenin loaded nanoparticles vs. 80:Diosgenin loaded nanoparticles	14.16	7.753 to 20.57	Yes	****	<0.0001
60:Diosgenin loaded nanoparticles vs. 100:Diosgenin	18.48	12.07 to 24.88	Yes	****	<0.0001
60:Diosgenin loaded nanoparticles vs. 100:Diosgenin loaded nanoparticles	22	15.60 to 28.41	Yes	****	<0.0001
80:Diosgenin vs. 80:Diosgenin loaded nanoparticles	4.64	-1.767 to 11.05	No	ns	0.4053
80:Diosgenin vs. 100:Diosgenin	8.957	2.549 to 15.36	Yes	***	0.0008
80:Diosgenin vs. 100:Diosgenin loaded nanoparticles	12.48	6.076 to 18.89	Yes	****	<0.0001
80:Diosgenin loaded nanoparticles vs. 100:Diosgenin	4.317	-2.091 to 10.72	No	ns	0.5269
80:Diosgenin loaded nanoparticles vs. 100:Diosgenin loaded nanoparticles	7.843	1.436 to 14.25	Yes	**	0.0055
100:Diosgenin vs. 100:Diosgenin loaded nanoparticles	3.527	-2.881 to 9.934	No	ns	0.8183
Test details	Mean 1	Mean 2	Mean Diff.	SE of diff.	N1	N2	q	DF
0:Diosgenin vs. 0:Diosgenin loaded nanoparticles	101.8	95.62	6.2	1.708	3	3	5.132	36
0:Diosgenin vs. 1:Diosgenin	101.8	97.91	3.903	1.708	3	3	3.231	36
0:Diosgenin vs. 1:Diosgenin loaded nanoparticles	101.8	87.17	14.65	1.708	3	3	12.13	36
0:Diosgenin vs. 5:Diosgenin	101.8	91.95	9.867	1.708	3	3	8.167	36
0:Diosgenin vs. 5:Diosgenin loaded nanoparticles	101.8	66.98	34.84	1.708	3	3	28.84	36
0:Diosgenin vs. 10:Diosgenin	101.8	83.56	18.25	1.708	3	3	15.11	36
0:Diosgenin vs. 10:Diosgenin loaded nanoparticles	101.8	58.11	43.71	1.708	3	3	36.18	36
0:Diosgenin vs. 20:Diosgenin	101.8	52.55	49.26	1.708	3	3	40.78	36
0:Diosgenin vs. 20:Diosgenin loaded nanoparticles	101.8	44.08	57.74	1.708	3	3	47.8	36
0:Diosgenin vs. 40:Diosgenin	101.8	44.77	57.05	1.708	3	3	47.23	36
0:Diosgenin vs. 40:Diosgenin loaded nanoparticles	101.8	38.46	63.36	1.708	3	3	52.45	36
0:Diosgenin vs. 60:Diosgenin	101.8	33.39	68.43	1.708	3	3	56.65	36
0:Diosgenin vs. 60:Diosgenin loaded nanoparticles	101.8	30.11	71.71	1.708	3	3	59.36	36
0:Diosgenin vs. 80:Diosgenin	101.8	20.59	81.23	1.708	3	3	67.24	36
0:Diosgenin vs. 80:Diosgenin loaded nanoparticles	101.8	15.95	85.87	1.708	3	3	71.08	36
0:Diosgenin vs. 100:Diosgenin	101.8	11.63	90.18	1.708	3	3	74.65	36
0:Diosgenin vs. 100:Diosgenin loaded nanoparticles	101.8	8.107	93.71	1.708	3	3	77.57	36
0:Diosgenin loaded nanoparticles vs. 1:Diosgenin	95.62	97.91	-2.297	1.708	3	3	1.901	36
0:Diosgenin loaded nanoparticles vs. 1:Diosgenin loaded nanoparticles	95.62	87.17	8.45	1.708	3	3	6.995	36
0:Diosgenin loaded nanoparticles vs. 5:Diosgenin	95.62	91.95	3.667	1.708	3	3	3.035	36
0:Diosgenin loaded nanoparticles vs. 5:Diosgenin loaded nanoparticles	95.62	66.98	28.64	1.708	3	3	23.71	36
0:Diosgenin loaded nanoparticles vs. 10:Diosgenin	95.62	83.56	12.05	1.708	3	3	9.978	36
0:Diosgenin loaded nanoparticles vs. 10:Diosgenin loaded nanoparticles	95.62	58.11	37.51	1.708	3	3	31.05	36
0:Diosgenin loaded nanoparticles vs. 20:Diosgenin	95.62	52.55	43.06	1.708	3	3	35.65	36
0:Diosgenin loaded nanoparticles vs. 20:Diosgenin loaded nanoparticles	95.62	44.08	51.54	1.708	3	3	42.66	36
0:Diosgenin loaded nanoparticles vs. 40:Diosgenin	95.62	44.77	50.85	1.708	3	3	42.09	36
0:Diosgenin loaded nanoparticles vs. 40:Diosgenin loaded nanoparticles	95.62	38.46	57.16	1.708	3	3	47.32	36
0:Diosgenin loaded nanoparticles vs. 60:Diosgenin	95.62	33.39	62.23	1.708	3	3	51.51	36
0:Diosgenin loaded nanoparticles vs. 60:Diosgenin loaded nanoparticles	95.62	30.11	65.51	1.708	3	3	54.23	36
0:Diosgenin loaded nanoparticles vs. 80:Diosgenin	95.62	20.59	75.03	1.708	3	3	62.11	36
0:Diosgenin loaded nanoparticles vs. 80:Diosgenin loaded nanoparticles	95.62	15.95	79.67	1.708	3	3	65.95	36
0:Diosgenin loaded nanoparticles vs. 100:Diosgenin	95.62	11.63	83.98	1.708	3	3	69.52	36
0:Diosgenin loaded nanoparticles vs. 100:Diosgenin loaded nanoparticles	95.62	8.107	87.51	1.708	3	3	72.44	36
1:Diosgenin vs. 1:Diosgenin loaded nanoparticles	97.91	87.17	10.75	1.708	3	3	8.896	36
1:Diosgenin vs. 5:Diosgenin	97.91	91.95	5.963	1.708	3	3	4.936	36
1:Diosgenin vs. 5:Diosgenin loaded nanoparticles	97.91	66.98	30.93	1.708	3	3	25.61	36
1:Diosgenin vs. 10:Diosgenin	97.91	83.56	14.35	1.708	3	3	11.88	36
1:Diosgenin vs. 10:Diosgenin loaded nanoparticles	97.91	58.11	39.8	1.708	3	3	32.95	36
1:Diosgenin vs. 20:Diosgenin	97.91	52.55	45.36	1.708	3	3	37.55	36
1:Diosgenin vs. 20:Diosgenin loaded nanoparticles	97.91	44.08	53.84	1.708	3	3	44.57	36
1:Diosgenin vs. 40:Diosgenin	97.91	44.77	53.15	1.708	3	3	43.99	36
1:Diosgenin vs. 40:Diosgenin loaded nanoparticles	97.91	38.46	59.46	1.708	3	3	49.22	36
1:Diosgenin vs. 60:Diosgenin	97.91	33.39	64.53	1.708	3	3	53.41	36
1:Diosgenin vs. 60:Diosgenin loaded nanoparticles	97.91	30.11	67.8	1.708	3	3	56.13	36
1:Diosgenin vs. 80:Diosgenin	97.91	20.59	77.32	1.708	3	3	64.01	36
1:Diosgenin vs. 80:Diosgenin loaded nanoparticles	97.91	15.95	81.96	1.708	3	3	67.85	36
1:Diosgenin vs. 100:Diosgenin	97.91	11.63	86.28	1.708	3	3	71.42	36
1:Diosgenin vs. 100:Diosgenin loaded nanoparticles	97.91	8.107	89.81	1.708	3	3	74.34	36
1:Diosgenin loaded nanoparticles vs. 5:Diosgenin	87.17	91.95	-4.783	1.708	3	3	3.96	36
1:Diosgenin loaded nanoparticles vs. 5:Diosgenin loaded nanoparticles	87.17	66.98	20.19	1.708	3	3	16.71	36
1:Diosgenin loaded nanoparticles vs. 10:Diosgenin	87.17	83.56	3.603	1.708	3	3	2.983	36
1:Diosgenin loaded nanoparticles vs. 10:Diosgenin loaded nanoparticles	87.17	58.11	29.06	1.708	3	3	24.05	36
1:Diosgenin loaded nanoparticles vs. 20:Diosgenin	87.17	52.55	34.61	1.708	3	3	28.65	36
1:Diosgenin loaded nanoparticles vs. 20:Diosgenin loaded nanoparticles	87.17	44.08	43.09	1.708	3	3	35.67	36
1:Diosgenin loaded nanoparticles vs. 40:Diosgenin	87.17	44.77	42.4	1.708	3	3	35.1	36
1:Diosgenin loaded nanoparticles vs. 40:Diosgenin loaded nanoparticles	87.17	38.46	48.71	1.708	3	3	40.32	36
1:Diosgenin loaded nanoparticles vs. 60:Diosgenin	87.17	33.39	53.78	1.708	3	3	44.52	36
1:Diosgenin loaded nanoparticles vs. 60:Diosgenin loaded nanoparticles	87.17	30.11	57.06	1.708	3	3	47.23	36
1:Diosgenin loaded nanoparticles vs. 80:Diosgenin	87.17	20.59	66.58	1.708	3	3	55.11	36
1:Diosgenin loaded nanoparticles vs. 80:Diosgenin loaded nanoparticles	87.17	15.95	71.22	1.708	3	3	58.95	36
1:Diosgenin loaded nanoparticles vs. 100:Diosgenin	87.17	11.63	75.53	1.708	3	3	62.53	36
1:Diosgenin loaded nanoparticles vs. 100:Diosgenin loaded nanoparticles	87.17	8.107	79.06	1.708	3	3	65.44	36
5:Diosgenin vs. 5:Diosgenin loaded nanoparticles	91.95	66.98	24.97	1.708	3	3	20.67	36
5:Diosgenin vs. 10:Diosgenin	91.95	83.56	8.387	1.708	3	3	6.942	36
5:Diosgenin vs. 10:Diosgenin loaded nanoparticles	91.95	58.11	33.84	1.708	3	3	28.01	36
5:Diosgenin vs. 20:Diosgenin	91.95	52.55	39.4	1.708	3	3	32.61	36
5:Diosgenin vs. 20:Diosgenin loaded nanoparticles	91.95	44.08	47.87	1.708	3	3	39.63	36
5:Diosgenin vs. 40:Diosgenin	91.95	44.77	47.18	1.708	3	3	39.06	36
5:Diosgenin vs. 40:Diosgenin loaded nanoparticles	91.95	38.46	53.49	1.708	3	3	44.28	36
5:Diosgenin vs. 60:Diosgenin	91.95	33.39	58.56	1.708	3	3	48.48	36
5:Diosgenin vs. 60:Diosgenin loaded nanoparticles	91.95	30.11	61.84	1.708	3	3	51.19	36
5:Diosgenin vs. 80:Diosgenin	91.95	20.59	71.36	1.708	3	3	59.07	36
5:Diosgenin vs. 80:Diosgenin loaded nanoparticles	91.95	15.95	76	1.708	3	3	62.91	36
5:Diosgenin vs. 100:Diosgenin	91.95	11.63	80.32	1.708	3	3	66.48	36
5:Diosgenin vs. 100:Diosgenin loaded nanoparticles	91.95	8.107	83.84	1.708	3	3	69.4	36
5:Diosgenin loaded nanoparticles vs. 10:Diosgenin	66.98	83.56	-16.58	1.708	3	3	13.73	36
5:Diosgenin loaded nanoparticles vs. 10:Diosgenin loaded nanoparticles	66.98	58.11	8.87	1.708	3	3	7.342	36
5:Diosgenin loaded nanoparticles vs. 20:Diosgenin	66.98	52.55	14.43	1.708	3	3	11.94	36
5:Diosgenin loaded nanoparticles vs. 20:Diosgenin loaded nanoparticles	66.98	44.08	22.9	1.708	3	3	18.96	36
5:Diosgenin loaded nanoparticles vs. 40:Diosgenin	66.98	44.77	22.21	1.708	3	3	18.39	36
5:Diosgenin loaded nanoparticles vs. 40:Diosgenin loaded nanoparticles	66.98	38.46	28.52	1.708	3	3	23.61	36
5:Diosgenin loaded nanoparticles vs. 60:Diosgenin	66.98	33.39	33.59	1.708	3	3	27.81	36
5:Diosgenin loaded nanoparticles vs. 60:Diosgenin loaded nanoparticles	66.98	30.11	36.87	1.708	3	3	30.52	36
5:Diosgenin loaded nanoparticles vs. 80:Diosgenin	66.98	20.59	46.39	1.708	3	3	38.4	36
5:Diosgenin loaded nanoparticles vs. 80:Diosgenin loaded nanoparticles	66.98	15.95	51.03	1.708	3	3	42.24	36
5:Diosgenin loaded nanoparticles vs. 100:Diosgenin	66.98	11.63	55.35	1.708	3	3	45.82	36
5:Diosgenin loaded nanoparticles vs. 100:Diosgenin loaded nanoparticles	66.98	8.107	58.87	1.708	3	3	48.73	36
10:Diosgenin vs. 10:Diosgenin loaded nanoparticles	83.56	58.11	25.45	1.708	3	3	21.07	36
10:Diosgenin vs. 20:Diosgenin	83.56	52.55	31.01	1.708	3	3	25.67	36
10:Diosgenin vs. 20:Diosgenin loaded nanoparticles	83.56	44.08	39.49	1.708	3	3	32.69	36
10:Diosgenin vs. 40:Diosgenin	83.56	44.77	38.8	1.708	3	3	32.12	36
10:Diosgenin vs. 40:Diosgenin loaded nanoparticles	83.56	38.46	45.11	1.708	3	3	37.34	36
10:Diosgenin vs. 60:Diosgenin	83.56	33.39	50.18	1.708	3	3	41.54	36
10:Diosgenin vs. 60:Diosgenin loaded nanoparticles	83.56	30.11	53.45	1.708	3	3	44.25	36
10:Diosgenin vs. 80:Diosgenin	83.56	20.59	62.97	1.708	3	3	52.13	36
10:Diosgenin vs. 80:Diosgenin loaded nanoparticles	83.56	15.95	67.61	1.708	3	3	55.97	36
10:Diosgenin vs. 100:Diosgenin	83.56	11.63	71.93	1.708	3	3	59.54	36
10:Diosgenin vs. 100:Diosgenin loaded nanoparticles	83.56	8.107	75.46	1.708	3	3	62.46	36
10:Diosgenin loaded nanoparticles vs. 20:Diosgenin	58.11	52.55	5.557	1.708	3	3	4.6	36
10:Diosgenin loaded nanoparticles vs. 20:Diosgenin loaded nanoparticles	58.11	44.08	14.03	1.708	3	3	11.62	36
10:Diosgenin loaded nanoparticles vs. 40:Diosgenin	58.11	44.77	13.34	1.708	3	3	11.05	36
10:Diosgenin loaded nanoparticles vs. 40:Diosgenin loaded nanoparticles	58.11	38.46	19.65	1.708	3	3	16.27	36
10:Diosgenin loaded nanoparticles vs. 60:Diosgenin	58.11	33.39	24.72	1.708	3	3	20.47	36
10:Diosgenin loaded nanoparticles vs. 60:Diosgenin loaded nanoparticles	58.11	30.11	28	1.708	3	3	23.18	36
10:Diosgenin loaded nanoparticles vs. 80:Diosgenin	58.11	20.59	37.52	1.708	3	3	31.06	36
10:Diosgenin loaded nanoparticles vs. 80:Diosgenin loaded nanoparticles	58.11	15.95	42.16	1.708	3	3	34.9	36
10:Diosgenin loaded nanoparticles vs. 100:Diosgenin	58.11	11.63	46.48	1.708	3	3	38.47	36
10:Diosgenin loaded nanoparticles vs. 100:Diosgenin loaded nanoparticles	58.11	8.107	50	1.708	3	3	41.39	36
20:Diosgenin vs. 20:Diosgenin loaded nanoparticles	52.55	44.08	8.477	1.708	3	3	7.017	36
20:Diosgenin vs. 40:Diosgenin	52.55	44.77	7.787	1.708	3	3	6.446	36
20:Diosgenin vs. 40:Diosgenin loaded nanoparticles	52.55	38.46	14.1	1.708	3	3	11.67	36
20:Diosgenin vs. 60:Diosgenin	52.55	33.39	19.17	1.708	3	3	15.87	36
20:Diosgenin vs. 60:Diosgenin loaded nanoparticles	52.55	30.11	22.44	1.708	3	3	18.58	36
20:Diosgenin vs. 80:Diosgenin	52.55	20.59	31.96	1.708	3	3	26.46	36
20:Diosgenin vs. 80:Diosgenin loaded nanoparticles	52.55	15.95	36.6	1.708	3	3	30.3	36
20:Diosgenin vs. 100:Diosgenin	52.55	11.63	40.92	1.708	3	3	33.87	36
20:Diosgenin vs. 100:Diosgenin loaded nanoparticles	52.55	8.107	44.45	1.708	3	3	36.79	36
20:Diosgenin loaded nanoparticles vs. 40:Diosgenin	44.08	44.77	-0.69	1.708	3	3	0.5712	36
20:Diosgenin loaded nanoparticles vs. 40:Diosgenin loaded nanoparticles	44.08	38.46	5.62	1.708	3	3	4.652	36
20:Diosgenin loaded nanoparticles vs. 60:Diosgenin	44.08	33.39	10.69	1.708	3	3	8.849	36
20:Diosgenin loaded nanoparticles vs. 60:Diosgenin loaded nanoparticles	44.08	30.11	13.97	1.708	3	3	11.56	36
20:Diosgenin loaded nanoparticles vs. 80:Diosgenin	44.08	20.59	23.49	1.708	3	3	19.44	36
20:Diosgenin loaded nanoparticles vs. 80:Diosgenin loaded nanoparticles	44.08	15.95	28.13	1.708	3	3	23.28	36
20:Diosgenin loaded nanoparticles vs. 100:Diosgenin	44.08	11.63	32.44	1.708	3	3	26.86	36
20:Diosgenin loaded nanoparticles vs. 100:Diosgenin loaded nanoparticles	44.08	8.107	35.97	1.708	3	3	29.78	36
40:Diosgenin vs. 40:Diosgenin loaded nanoparticles	44.77	38.46	6.31	1.708	3	3	5.223	36
40:Diosgenin vs. 60:Diosgenin	44.77	33.39	11.38	1.708	3	3	9.42	36
40:Diosgenin vs. 60:Diosgenin loaded nanoparticles	44.77	30.11	14.66	1.708	3	3	12.13	36
40:Diosgenin vs. 80:Diosgenin	44.77	20.59	24.18	1.708	3	3	20.01	36
40:Diosgenin vs. 80:Diosgenin loaded nanoparticles	44.77	15.95	28.82	1.708	3	3	23.85	36
40:Diosgenin vs. 100:Diosgenin	44.77	11.63	33.13	1.708	3	3	27.43	36
40:Diosgenin vs. 100:Diosgenin loaded nanoparticles	44.77	8.107	36.66	1.708	3	3	30.35	36
40:Diosgenin loaded nanoparticles vs. 60:Diosgenin	38.46	33.39	5.07	1.708	3	3	4.197	36
40:Diosgenin loaded nanoparticles vs. 60:Diosgenin loaded nanoparticles	38.46	30.11	8.347	1.708	3	3	6.909	36
40:Diosgenin loaded nanoparticles vs. 80:Diosgenin	38.46	20.59	17.87	1.708	3	3	14.79	36
40:Diosgenin loaded nanoparticles vs. 80:Diosgenin loaded nanoparticles	38.46	15.95	22.51	1.708	3	3	18.63	36
40:Diosgenin loaded nanoparticles vs. 100:Diosgenin	38.46	11.63	26.82	1.708	3	3	22.2	36
40:Diosgenin loaded nanoparticles vs. 100:Diosgenin loaded nanoparticles	38.46	8.107	30.35	1.708	3	3	25.12	36
60:Diosgenin vs. 60:Diosgenin loaded nanoparticles	33.39	30.11	3.277	1.708	3	3	2.712	36
60:Diosgenin vs. 80:Diosgenin	33.39	20.59	12.8	1.708	3	3	10.59	36
60:Diosgenin vs. 80:Diosgenin loaded nanoparticles	33.39	15.95	17.44	1.708	3	3	14.43	36
60:Diosgenin vs. 100:Diosgenin	33.39	11.63	21.75	1.708	3	3	18.01	36
60:Diosgenin vs. 100:Diosgenin loaded nanoparticles	33.39	8.107	25.28	1.708	3	3	20.93	36
60:Diosgenin loaded nanoparticles vs. 80:Diosgenin	30.11	20.59	9.52	1.708	3	3	7.881	36
60:Diosgenin loaded nanoparticles vs. 80:Diosgenin loaded nanoparticles	30.11	15.95	14.16	1.708	3	3	11.72	36
60:Diosgenin loaded nanoparticles vs. 100:Diosgenin	30.11	11.63	18.48	1.708	3	3	15.29	36
60:Diosgenin loaded nanoparticles vs. 100:Diosgenin loaded nanoparticles	30.11	8.107	22	1.708	3	3	18.21	36
80:Diosgenin vs. 80:Diosgenin loaded nanoparticles	20.59	15.95	4.64	1.708	3	3	3.841	36
80:Diosgenin vs. 100:Diosgenin	20.59	11.63	8.957	1.708	3	3	7.414	36
80:Diosgenin vs. 100:Diosgenin loaded nanoparticles	20.59	8.107	12.48	1.708	3	3	10.33	36
80:Diosgenin loaded nanoparticles vs. 100:Diosgenin	15.95	11.63	4.317	1.708	3	3	3.573	36
80:Diosgenin loaded nanoparticles vs. 100:Diosgenin loaded nanoparticles	15.95	8.107	7.843	1.708	3	3	6.493	36
100:Diosgenin vs. 100:Diosgenin loaded nanoparticles	11.63	8.107	3.527	1.708	3	3	2.919	36
