# Supplementary material for: Synthesis and Characterization of Diosgenin Encapsulated Poly-ε-Caprolactone-Pluronic Nanoparticles and Its Effect on Brain Cancer Cells
Source: Polymers (Basel). 2021 Apr 18;13(8):1322. doi: 10.3390/polym13081322 (PMC8073865; doi:10.3390/polym13081322)
Supplement: Supplementary file 1 [file polymers-13-01322-s001.zip › Supplementary File drug release study of diosgenin nanoparticles.xlsx]

## Sheet: Sheet1
Time (hr)	pH 6.5	pH 6.5	pH 6.5	pH 7.4	pH 7.4	pH 7.4					Time (hr)	pH 6.5	pH 6.5	pH 6.5	AVERAGE	STDEV	pH 7.4	pH 7.4	pH 7.4	AVERAGE	STDEV
1	8.8	10.52	8.98	7.96	7.82	9.95					1	8.8	10.52	8.98	9.43333	0.945375	7.96	7.82	9.95	8.57667	1.1914
2	12.5	14.41	13.59	9.84	11.45	12.06					2	12.5	14.41	13.59	13.5	0.958175	9.84	11.45	12.06	11.1167	1.14692
5	28.93	31.41	31.99	17.82	16.97	20.61					5	28.93	31.41	31.99	30.7767	1.62534	17.82	16.97	20.61	18.4667	1.90421
8	43.46	40.5	41.6	22.98	26.54	24.73					8	43.46	40.5	41.6	41.8533	1.49617	22.98	26.54	24.73	24.75	1.78008
12	57.72	60.83	53.95	36.85	38.84	39.02					12	57.72	60.83	53.95	57.5	3.44527	36.85	38.84	39.02	38.2367	1.20426
24	68.62	73.24	69.93	38.84	40.64	39.01					24	68.62	73.24	69.93	70.5967	2.38106	38.84	40.64	39.01	39.4967	0.993797
36	71.27	76.11	69.94	41.74	43.22	41.49					36	71.27	76.11	69.94	72.44	3.24714	41.74	43.22	41.49	42.15	0.93504
48	74.76	78.91	77.94	44.94	45.75	47.89					48	74.76	78.91	77.94	77.2033	2.17086	44.94	45.75	47.89	46.1933	1.52415
																Time (hr)	pH 6.5	pH 7.4
																1	9.43333	8.57667
																2	13.5	11.1167
																5	30.7767	18.4667
																8	41.8533	24.75
																12	57.5	38.2367
																24	70.5967	39.4967
																36	72.44	42.15
																48	77.2033	46.1933

## Sheet: zero order
	time	cpdr pH 6.5	cpdr pH 7.4
	1	9.43	8.58
	2	13.5	11.12
	5	30.78	18.47
	8	41.85	24.75
	12	57.5	38.24
	24	70.59	39.49
	36	72.44	42.15
	48	77.2	46.19

## Sheet: first order
	time	cpdr pH 6.5	cpdr pH 7.4
	1	9.43	8.58			time	cpdr pH 6.5	cpdr pH 6.5 log	cpdr pH 7.4	cpdr pH 7.4 log
	2	13.5	11.12			1	9.43	0.974512	8.58	0.933487
	5	30.78	18.47			2	13.5	1.13033	11.12	1.0461
	8	41.85	24.75			5	30.78	1.48827	18.47	1.26647
	12	57.5	38.24			8	41.85	1.6217	24.75	1.39358
	24	70.59	39.49			12	57.5	1.75967	38.24	1.58252
	36	72.44	42.15			24	70.59	1.84874	39.49	1.59649
	48	77.2	46.19			36	72.44	1.85998	42.15	1.6248
						48	77.2	1.88762	46.19	1.66455
	time	cpdr pH 6.5	cpdr pH 6.5 log	cpdr pH 7.4	cpdr pH 7.4 log
	1	9.43	0.974512	8.58	0.933487
	2	13.5	1.13033	11.12	1.0461
	5	30.78	1.48827	18.47	1.26647
	8	41.85	1.6217	24.75	1.39358
	12	57.5	1.75967	38.24	1.58252
	24	70.59	1.84874	39.49	1.59649
	36	72.44	1.85998	42.15	1.6248
	48	77.2	1.88762	46.19	1.66455

## Sheet: higuchi model
	time	time sq rt.	cpdr pH 6.5	cpdr pH 6.5 log	cpdr pH 7.4	cpdr pH 7.4 log
	1	1	9.43	0.974512	8.58	0.933487
	2	1.41421	13.5	1.13033	11.12	1.0461
	5	2.23607	30.78	1.48827	18.47	1.26647
	8	2.82843	41.85	1.6217	24.75	1.39358
	12	3.4641	57.5	1.75967	38.24	1.58252
	24	4.89898	70.59	1.84874	39.49	1.59649
	36	6	72.44	1.85998	42.15	1.6248
	48	6.9282	77.2	1.88762	46.19	1.66455
		time sq rt.	cpdr pH 6.5	cpdr pH 7.4
		1	9.43	8.58
		1.41	13.5	11.12
		2.23	30.78	18.47
		2.82	41.85	24.75
		3.46	57.5	38.24
		4.89	70.59	39.49
		6	72.44	42.15
		6.92	77.2	46.19

## Sheet: korsmeyer peppas model
time	time log	cpdr pH 6.5	cpdr pH 6.5 log	cpdr pH 7.4	cpdr pH 7.4 log
1	0	9.43	0.974512	8.58	0.933487
2	0.30103	13.5	1.13033	11.12	1.0461
5	0.69897	30.78	1.48827	18.47	1.26647
8	0.90309	41.85	1.6217	24.75	1.39358
12	1.07918	57.5	1.75967	38.24	1.58252
24	1.38021	70.59	1.84874	39.49	1.59649
36	1.5563	72.44	1.85998	42.15	1.6248
48	1.68124	77.2	1.88762	46.19	1.66455		time log	cpdr pH 7.4 log	cpdr pH 6.5 log
							0	0.933487	0.974512
							0.30103	1.0461	1.13033
							0.69897	1.26647	1.48827
							0.90309	1.39358	1.6217
							1.07918	1.58252	1.75967
							1.38021	1.59649	1.84874
							1.5563	1.6248	1.85998
							1.68124	1.66455	1.88762

## Sheet: korsmeyer peppas model fit
		6.5
	time	data	FIT	SD						F = Ktn
	1	9.43333	16.4224	48.8466	k	16.4224
	2	13.5	22.0006	72.26	n	0.42188
	5	30.7767	32.383	2.58033	R2	0.965946
	8	41.8533	39.4849	5.60938
	12	57.5	46.8512	113.397	ssd	355.52
	24	70.5967	62.7652	61.3315
	36	72.44	74.4746	4.13978
	48	77.2033	84.0848	47.3548
			7.4
	time	data	FIT	SD			F = Ktn
	1	8.57667	11.3153	7.50017
	2	11.1167	14.7045	12.8722	k	11.3153
	5	18.4667	20.7903	5.39942	n	0.377977
	8	24.75	24.8321	0.00674711	R2	0.958981
	12	38.2367	28.9449	86.3361
	24	39.4967	37.6145	3.54256	ssd	125.75
	36	42.15	43.8444	2.87088
	48	46.1933	48.8807	7.22219
